# Supplementary material for: Does high-latitude ionospheric electrodynamics exhibit hemispheric mirror symmetry?
Source: Copernicus journal article supplement (doi:10.5194/angeo-42-229-2024), 2024-06-04
Supplement: Supplementary file 1 [file angeo-42-229-2024-supplement.zip]

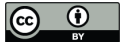

## *Supplement of*

# **Does high-latitude ionospheric electrodynamics exhibit hemispheric mirror symmetry?**

**Spencer Mark Hatch et al.**

*Correspondence to:* Spencer Mark Hatch ([spencer.hatch@uib.no](mailto:spencer.hatch@uib.no))

- [angeo-42-229-2024-supplement-title-page.pdf](#)
- [Swarm\\_Hi\\_C\\_WP4\\_report.pdf](#)
- [Swarm\\_Hi\\_C\\_angeo\\_\\_revisions\\_supplementary\\_figs.pdf](#)

The copyright of individual parts of the supplement might differ from the article licence.
