# Supplementary material for: Does high-latitude ionospheric electrodynamics exhibit hemispheric mirror symmetry?
Source: Copernicus journal article supplement (doi:10.5194/angeo-42-229-2024), 2024-06-04
Supplement: Supplementary file 3 [file angeo-42-229-2024-supplement.zip]

# Supplementary Figures for "Does high-latitude ionospheric electrodynamics exhibit hemispheric mirror symmetry?"

Spencer Mark Hatch<sup>1</sup>, Heikki Vanhamäki<sup>2</sup>, Karl Magnus Laundal<sup>1</sup>, Jone Peter Reistad<sup>1</sup>, Johnathan K. Burchill<sup>3</sup>, Levan Lomidze<sup>3</sup>, David J. Knudsen<sup>3</sup>, Michael Madelaire<sup>1</sup>, and Habtamu Tesfaw<sup>2</sup>

<sup>1</sup>Department of Physics and Technology, University of Bergen, Bergen, Norway

<sup>2</sup>Space Physics and Astronomy Research Unit, University of Oulu, Oulu, Finland

<sup>3</sup>Department of Physics and Astronomy, University of Calgary, Calgary, Alberta, Canada

**Correspondence:** Spencer Mark Hatch (spencer.hatch@uib.no)

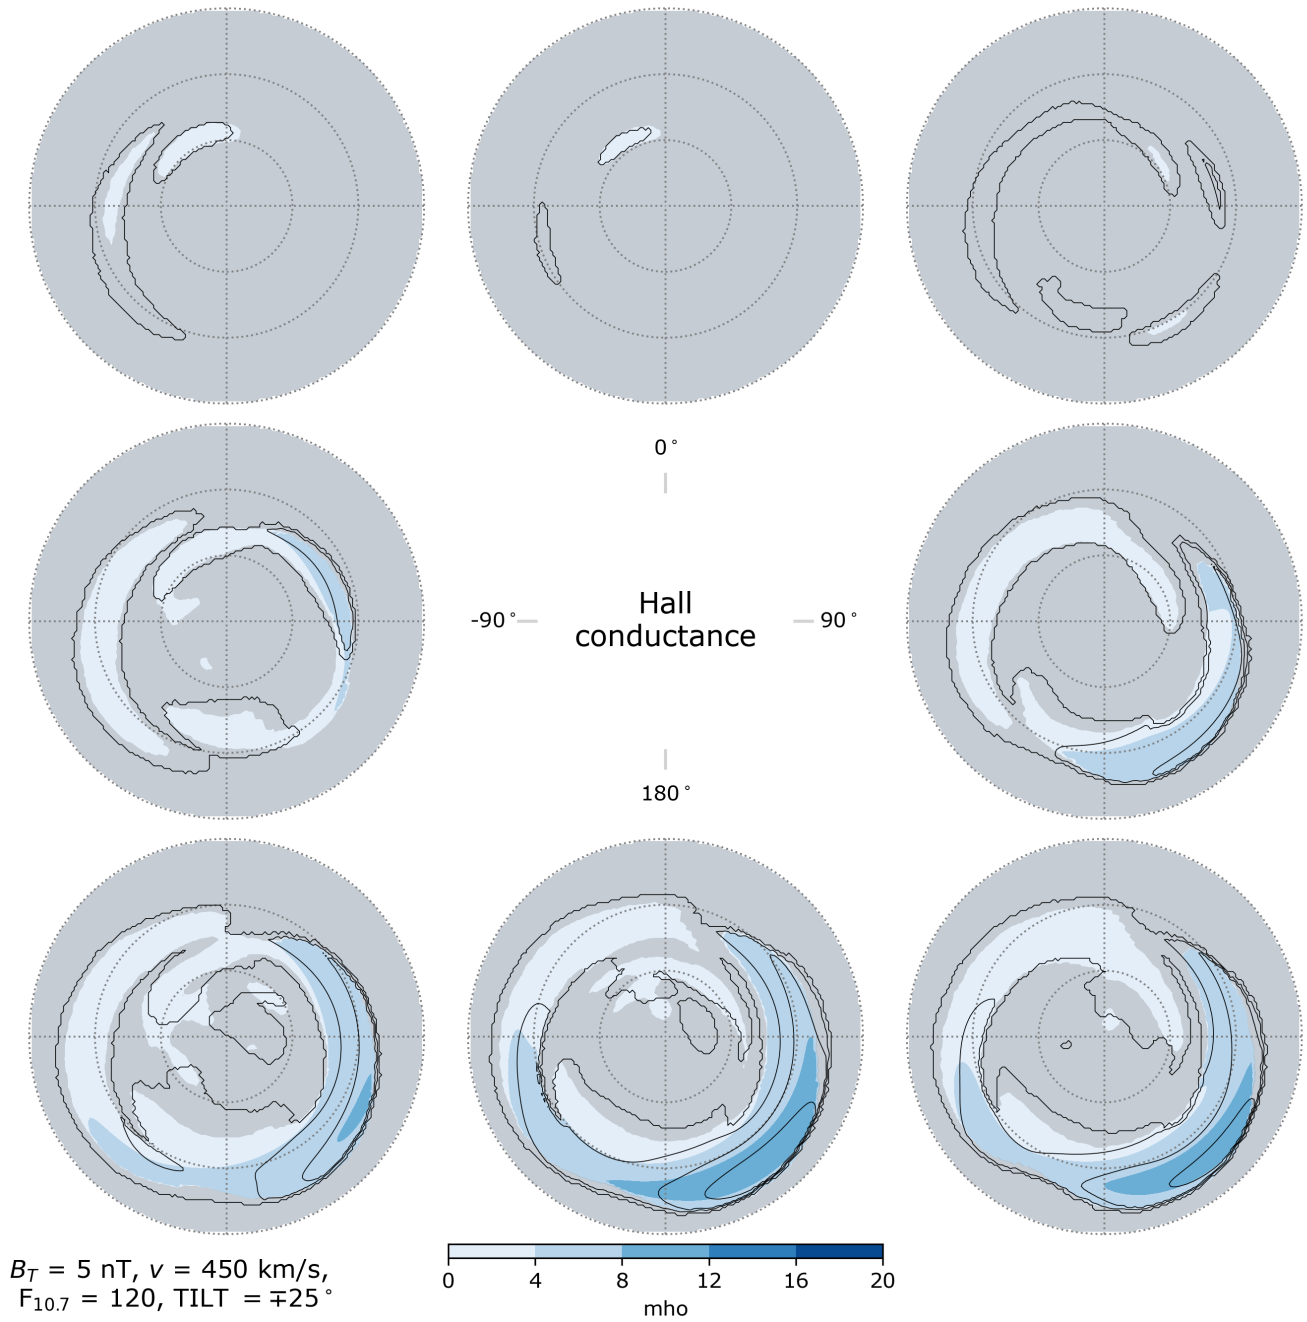

**Figure S1.** Hall conductance in the Southern Hemisphere (colored contours) and Northern Hemisphere (black contour lines) as a function of IMF clock angle for dipole tilt angle  $\Psi = \pm 25^\circ$  (local winter), in the same layout as Figure 2 in the main text. Areas where the criteria (37) are not met in the Southern Hemisphere are indicated in gray.

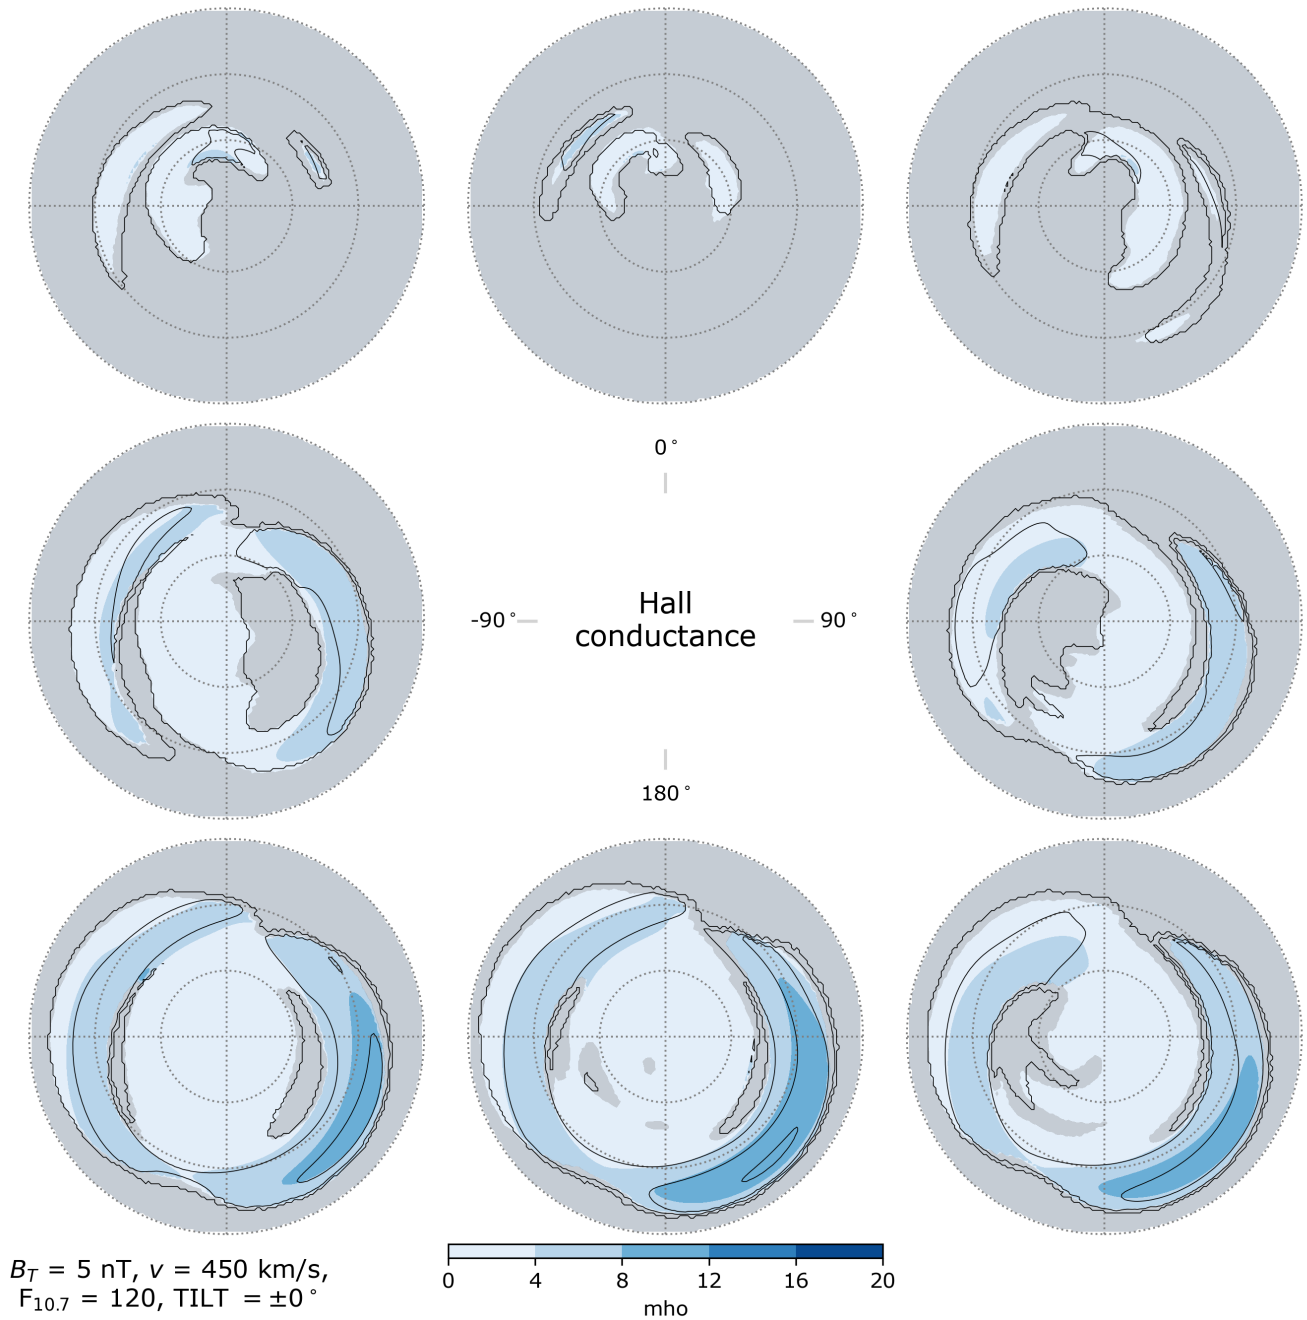

**Figure S2.** Hall conductance in the Southern Hemisphere (colored contours) and Northern Hemisphere (black contour lines) as a function of IMF clock angle for dipole tilt angle  $\Psi = 0^\circ$  (equinox), in the same layout as Figure 2 in the main text. Areas where the criteria (37) are not met in the Southern Hemisphere are indicated in gray.



**Figure S3.** Hall conductance in the Southern Hemisphere (colored contours) and Northern Hemisphere (black contour lines) as a function of IMF clock angle for dipole tilt angle  $\Psi = \pm 25^\circ$  (local summer), in the same layout as Figure ?? in the main text. Areas where the criteria (37) are not met in the Southern Hemisphere are indicated in gray.

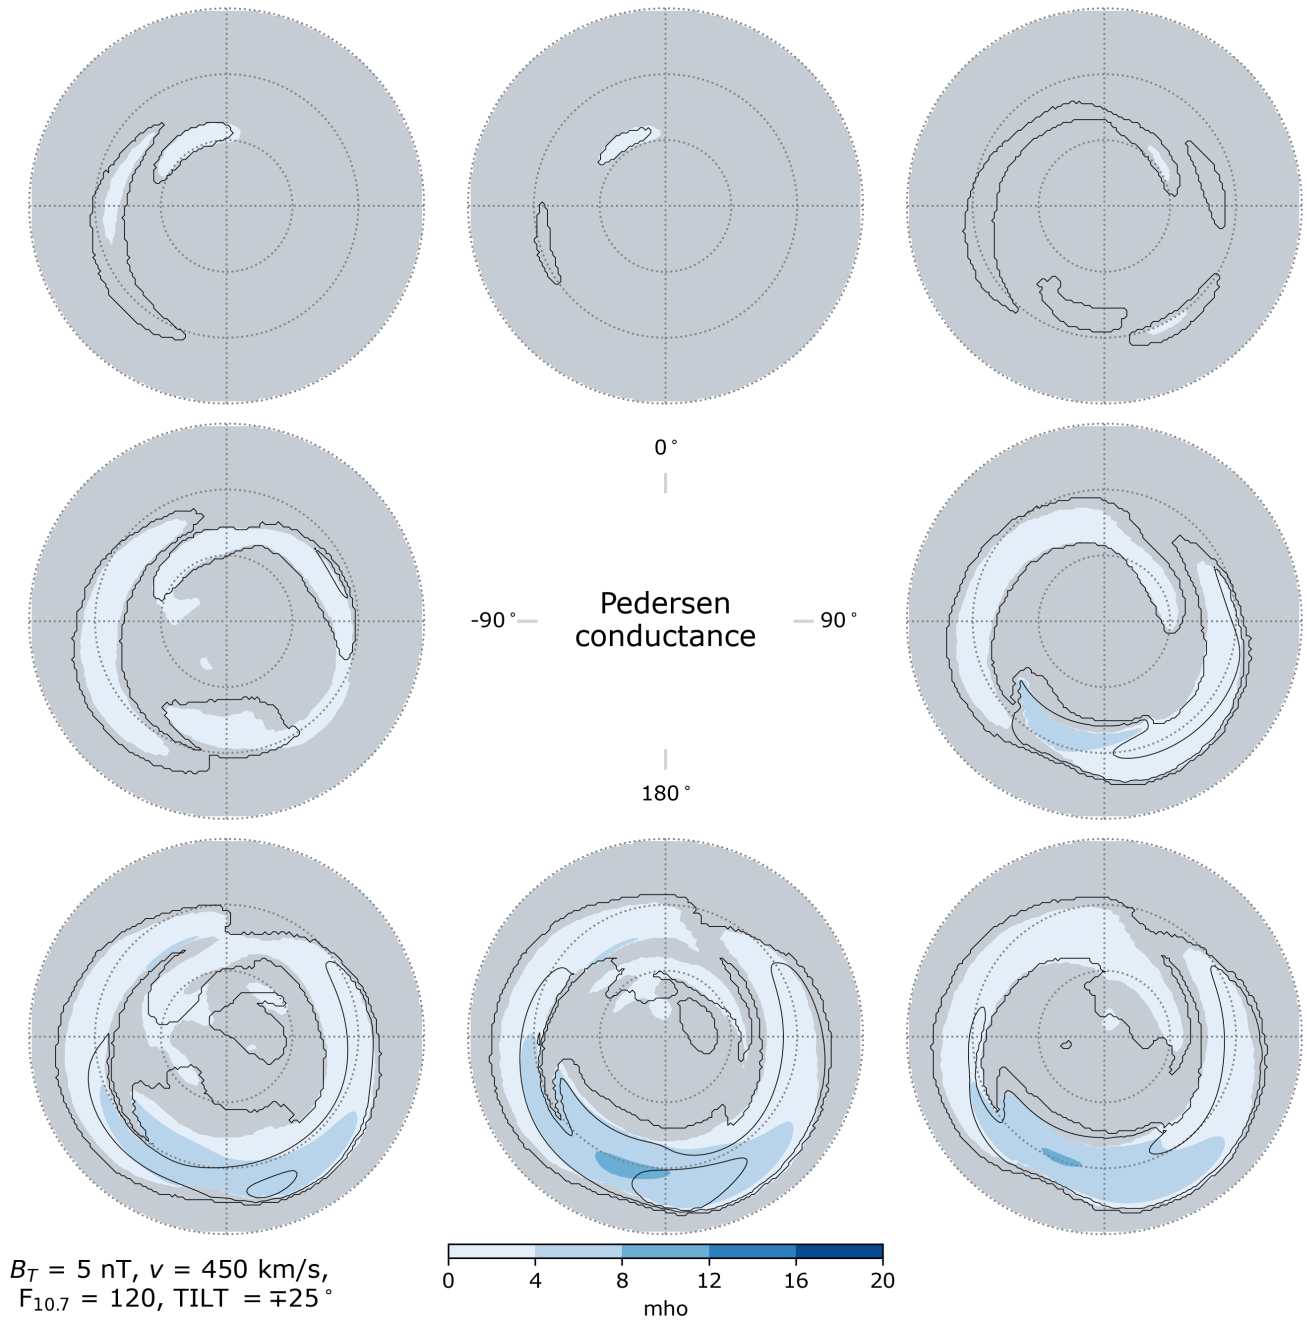

**Figure S4.** Pedersen conductance in the Southern Hemisphere (colored contours) and Northern Hemisphere (black contour lines) as a function of IMF clock angle for dipole tilt angle  $\Psi = \pm 25^\circ$  (local winter), in the same layout as Figure 2 in the main text. Areas where the criteria (37) are not met in the Southern Hemisphere are indicated in gray.

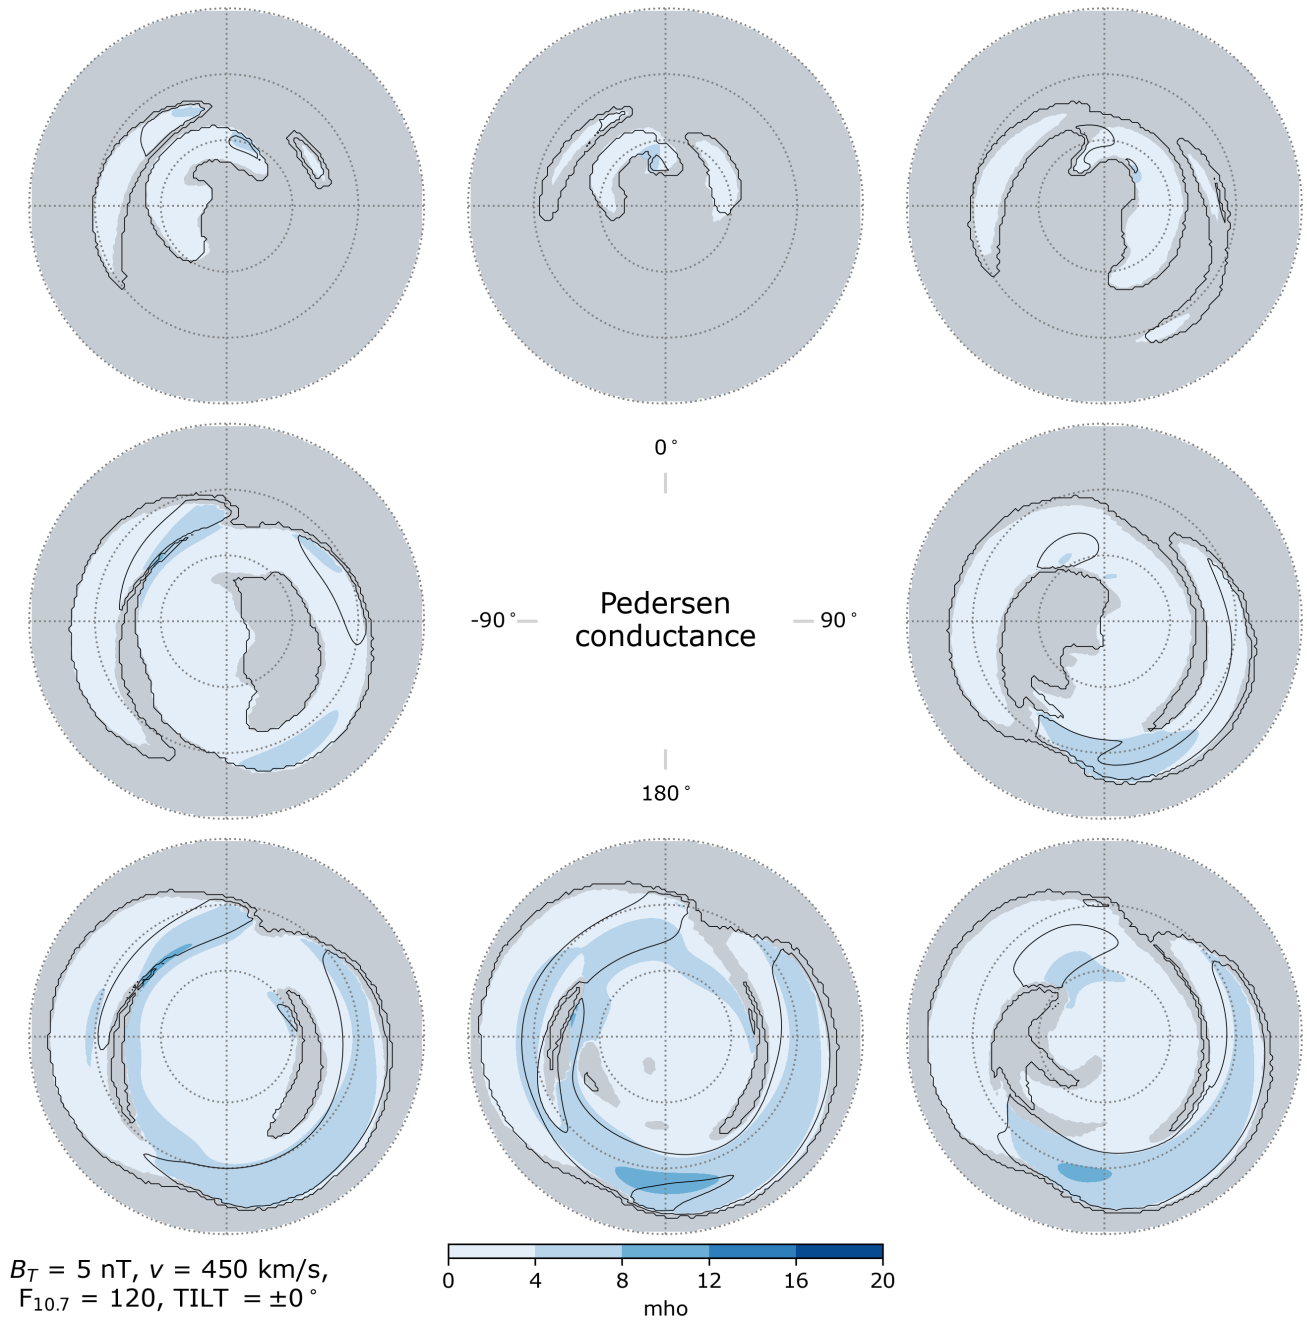

**Figure S5.** Pedersen conductance in the Southern Hemisphere (colored contours) and Northern Hemisphere (black contour lines) as a function of IMF clock angle for dipole tilt angle  $\Psi = 0^\circ$  (equinox), in the same layout as Figure 2 in the main text. Areas where the criteria (37) are not met in the Northern Hemisphere are indicated in gray.

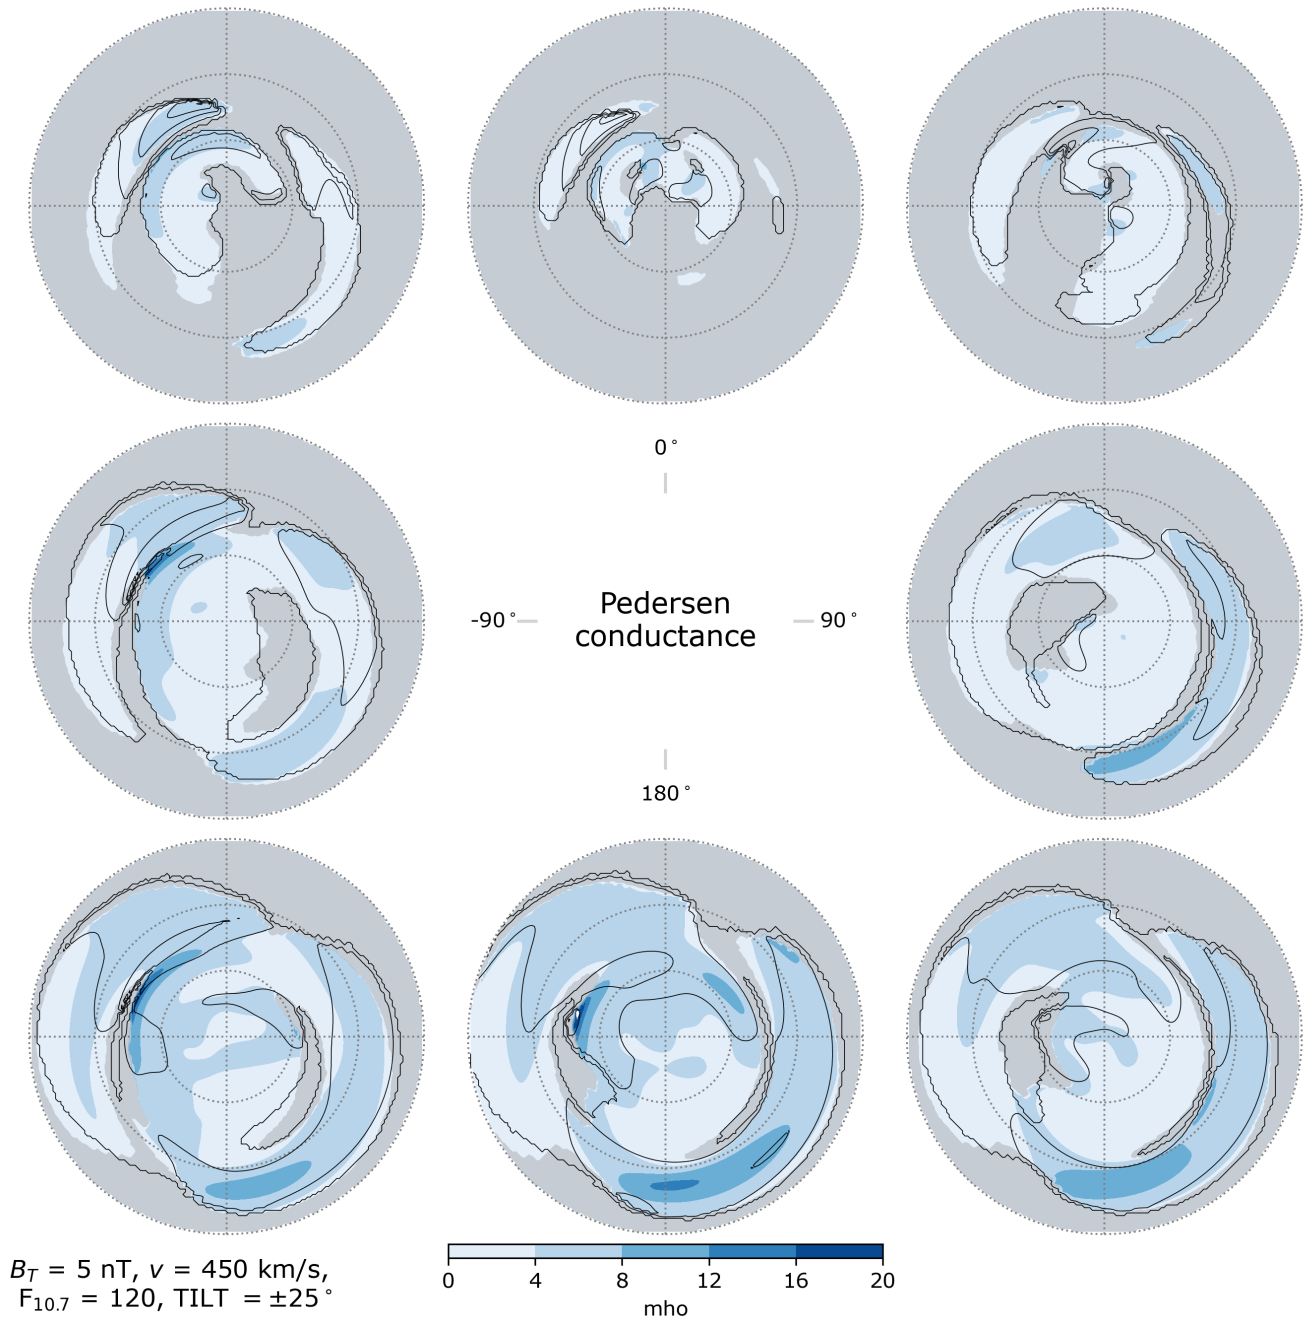

**Figure S6.** Pedersen conductance in the Southern Hemisphere (colored contours) and Northern Hemisphere (black contour lines) as a function of IMF clock angle for dipole tilt angle  $\Psi = \pm 25^\circ$  (local summer), in the same layout as Figure 2 in the main text. Areas where the criteria (37) are not met in the Northern Hemisphere are indicated in gray.



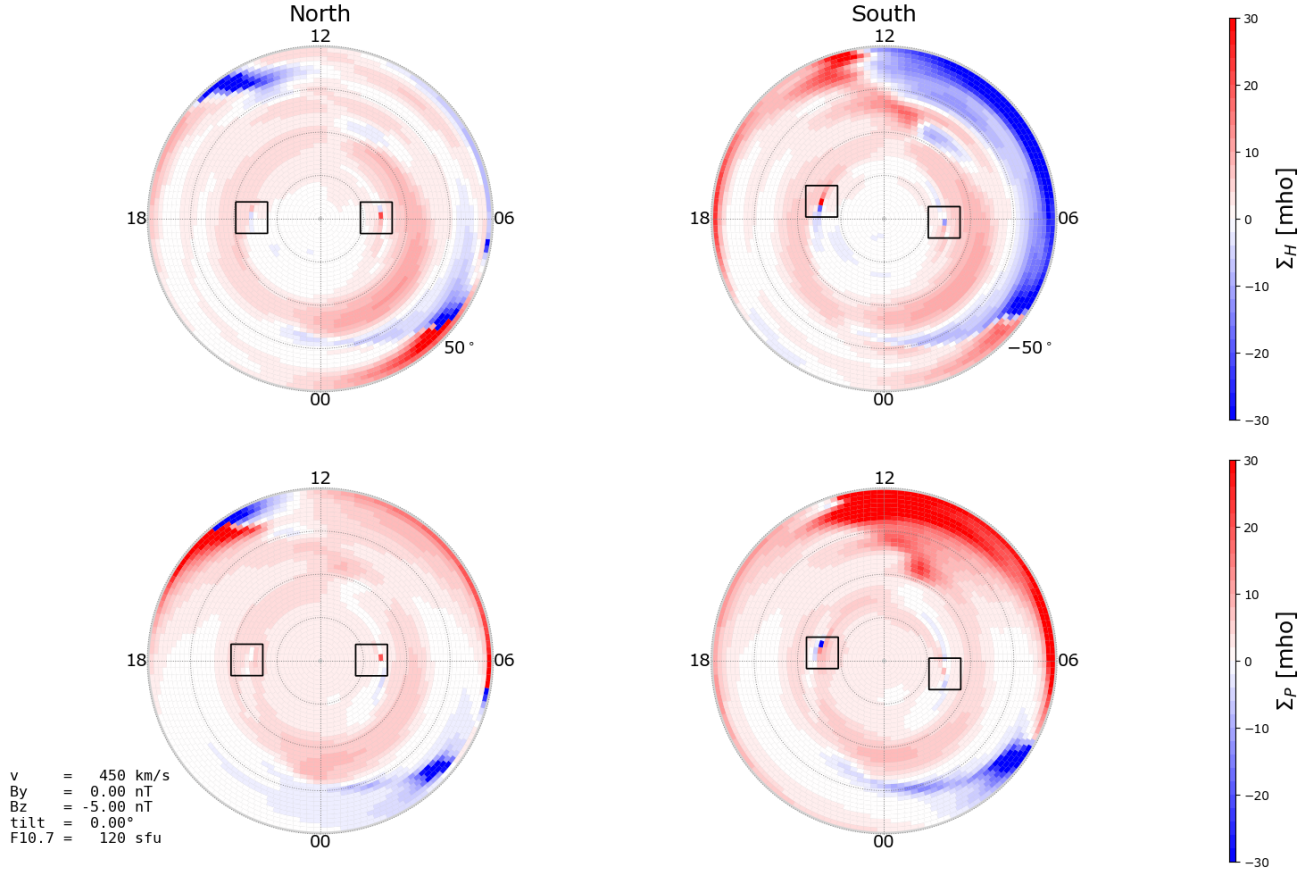

The locations of the sharp gradients and negative conductances in general vary with IMF orientation, solar wind speed, and other model parameters.

The locations of the sharp gradients and negative conductances in general vary with IMF orientation, solar wind speed, and other model parameters.

**Figure S7.** Hall (top row) and Pedersen (bottom row) conductance distributions in the Northern (left column) and Southern (right column) Hemispheres without criteria (37) applied. In the locations indicated by black boxes the conductances change by as much as 50 mho from one grid cell to the next. There are also many cells within which the conductances are negative (blue).

The locations of the sharp gradients and negative conductances in general vary with IMF orientation, solar wind speed, and other model parameters.
